# Supplementary material
Source: PubMed Central journal article supplement (PMC8086467)

## Deep-learning-aided forward optical coherence tomography endoscope for percutaneous nephrostomy guidance: supplement

CHEN WANG,<sup>1,7</sup> PAUL CALLE,<sup>1,7</sup> NU BAO TRAN TON,<sup>1</sup> ZUYUAN ZHANG,<sup>2</sup> FENG YAN,<sup>1</sup>  ANTHONY M. DONALDSON,<sup>1</sup> NATHAN A. BRADLEY,<sup>3</sup> ZHONGXIN YU,<sup>4</sup> KAR-MING FUNG,<sup>5,6</sup> CHONGLE PAN,<sup>2,8</sup> AND QINGGONG TANG<sup>1,9</sup>

<sup>1</sup>Stephenson School of Biomedical Engineering, University of Oklahoma, Norman, OK 73072, USA

<sup>2</sup>School of Computer Science, University of Oklahoma, Norman, OK 73072, USA

<sup>3</sup>Department of Urology, University of Oklahoma Health Sciences Center, Oklahoma City, OK 73104, USA

<sup>4</sup>Children's Hospital, University of Oklahoma Health Sciences Center, Oklahoma City, OK 73104, USA

<sup>5</sup>Department of Pathology, University of Oklahoma Health Sciences Center, Oklahoma City, OK 73104, USA

<sup>6</sup>Stephenson Cancer Center, University of Oklahoma Health Sciences Center, Oklahoma City, OK 73104, USA

<sup>7</sup>These authors contributed equally to this work

<sup>8</sup>[cpan@ou.edu](mailto:cpan@ou.edu)

<sup>9</sup>[qtang@ou.edu](mailto:qtang@ou.edu)

---

This supplement published with The Optical Society on 29 March 2021 by The Authors under the terms of the [Creative Commons Attribution 4.0 License](https://creativecommons.org/licenses/by/4.0/) in the format provided by the authors and unedited. Further distribution of this work must maintain attribution to the author(s) and the published article's title, journal citation, and DOI.

Supplement DOI: <https://doi.org/10.6084/m9.figshare.14251607>

Parent Article DOI: <https://doi.org/10.1364/BOE.421299>

# Deep-learning-aided forward optical coherence tomography endoscope for percutaneous nephrostomy guidance: supplement

**CHEN WANG<sup>1, 7</sup>, PAUL CALLE<sup>2, 7</sup>, NU BAO TRAN TON<sup>1</sup>, ZUYUAN ZHANG<sup>2</sup>, FENG YAN<sup>1</sup>, ANTHONY M. DONALDSON<sup>1</sup>, NATHAN A. BRADLEY<sup>3</sup>, ZHONGXIN YU<sup>4</sup>, KAR-MING FUNG<sup>5, 6</sup>, CHONGLE PAN<sup>2, 8</sup>, QINGGONG TANG<sup>1, 9</sup>**

<sup>1</sup>*Stephenson School of Biomedical Engineering, University of Oklahoma, Norman, OK 73072*

<sup>2</sup>*School of Computer Science, University of Oklahoma, Norman, OK 73072*

<sup>3</sup>*Department of Urology, University of Oklahoma Health Sciences Center, Oklahoma City, OK 73104*

<sup>4</sup>*Children's Hospital, University of Oklahoma Health Sciences Center, Oklahoma City, OK 73104*

<sup>5</sup>*Department of Pathology, University of Oklahoma Health Sciences Center, Oklahoma City, OK 73104*

<sup>6</sup>*Stephenson Cancer Center, University of Oklahoma Health Sciences Center, Oklahoma City, OK 73104*

<sup>7</sup>*These authors contributed equally to this work.*

<sup>8</sup>[cpan@ou.edu](mailto:cpan@ou.edu)

<sup>9</sup>[qtang@ou.edu](mailto:qtang@ou.edu)

# Deep-learning-aided forward optical coherence tomography endoscope for percutaneous nephrostomy guidance: supplemental document

The following table 1-4 show the 9-fold cross validation results using models including: Resnet34, PT MobileNetv2, ResNet50 and PT Resnet50, respectively.

**Table 1. Training results of the 9-fold cross validation using ResNet34**

| Testing folds  | k1_val       | k2_val       | k3_val       | k4_val       | k5_val       | k6_val       | k7_val       | k8_val       | k9_val       | k10_val      | average      | std error   |
|----------------|--------------|--------------|--------------|--------------|--------------|--------------|--------------|--------------|--------------|--------------|--------------|-------------|
| K1             |              | 77.0%        | 84.6%        | 96.1%        | 98.1%        | 86.8%        | 64.5%        | 76.4%        | 97.6%        | 73.4%        | <b>83.8%</b> | <b>3.7%</b> |
| K2             | 85.8%        |              | 79.7%        | 96.1%        | 94.3%        | 79.7%        | 74.4%        | 80.0%        | 96.9%        | 74.7%        | <b>84.6%</b> | <b>2.8%</b> |
| K3             | 95.4%        | 81.6%        |              | 91.8%        | 95.7%        | 88.6%        | 71.0%        | 72.9%        | 94.5%        | 68.9%        | <b>84.5%</b> | <b>3.5%</b> |
| K4             | 82.4%        | 89.1%        | 76.5%        |              | 92.3%        | 86.3%        | 72.7%        | 82.7%        | 96.4%        | 73.1%        | <b>83.5%</b> | <b>2.6%</b> |
| K5             | 82.4%        | 93.3%        | 87.2%        | 93.0%        |              | 89.0%        | 75.6%        | 58.9%        | 99.0%        | 67.0%        | <b>82.8%</b> | <b>4.2%</b> |
| K6             | 84.2%        | 93.3%        | 73.5%        | 92.1%        | 99.3%        |              | 72.2%        | 73.5%        | 97.8%        | 74.4%        | <b>84.5%</b> | <b>3.6%</b> |
| K7             | 84.7%        | 91.2%        | 68.8%        | 97.1%        | 83.2%        | 79.3%        |              | 80.2%        | 91.2%        | 69.8%        | <b>82.8%</b> | <b>3.0%</b> |
| K8             | 90.0%        | 88.4%        | 81.3%        | 97.2%        | 97.3%        | 65.0%        | 83.6%        |              | 70.0%        | 66.2%        | <b>82.1%</b> | <b>3.9%</b> |
| K9             | 72.2%        | 90.5%        | 70.0%        | 95.4%        | 96.8%        | 88.5%        | 76.0%        | 62.6%        |              | 62.2%        | <b>79.4%</b> | <b>4.3%</b> |
| K10            | 85.0%        | 91.2%        | 79.1%        | 97.5%        | 93.1%        | 90.0%        | 69.8%        | 80.1%        | 91.5%        |              | <b>86.4%</b> | <b>2.7%</b> |
| <b>Average</b> | <b>84.7%</b> | <b>88.4%</b> | <b>77.9%</b> | <b>95.2%</b> | <b>94.5%</b> | <b>83.7%</b> | <b>73.3%</b> | <b>74.1%</b> | <b>92.8%</b> | <b>70.0%</b> |              |             |

**Table 2. Training results of the 9-fold cross validation using PT MobileNetv2**

| Testing folds  | k1_val       | k2_val       | k3_val       | k4_val       | k5_val       | k6_val       | k7_val       | k8_val       | k9_val       | k10_val      | average      | std error   |
|----------------|--------------|--------------|--------------|--------------|--------------|--------------|--------------|--------------|--------------|--------------|--------------|-------------|
| K1             |              | 88.0%        | 90.7%        | 97.9%        | 95.4%        | 71.1%        | 69.5%        | 85.0%        | 86.3%        | 73.5%        | <b>84.1%</b> | <b>3.5%</b> |
| K2             | 86.8%        |              | 79.9%        | 88.8%        | 99.5%        | 79.3%        | 65.5%        | 81.4%        | 93.4%        | 64.5%        | <b>82.1%</b> | <b>3.9%</b> |
| K3             | 93.3%        | 96.2%        |              | 89.1%        | 96.1%        | 75.9%        | 65.8%        | 71.7%        | 96.3%        | 70.7%        | <b>83.9%</b> | <b>4.2%</b> |
| K4             | 85.6%        | 93.8%        | 35.6%        |              | 92.0%        | 77.3%        | 65.7%        | 85.7%        | 94.9%        | 71.3%        | <b>78.0%</b> | <b>6.3%</b> |
| K5             | 87.8%        | 91.7%        | 69.0%        | 91.6%        |              | 79.0%        | 83.7%        | 78.8%        | 77.0%        | 91.6%        | <b>83.3%</b> | <b>2.7%</b> |
| K6             | 81.5%        | 90.1%        | 75.5%        | 89.7%        | 98.8%        |              | 77.0%        | 80.1%        | 93.9%        | 88.9%        | <b>86.2%</b> | <b>2.7%</b> |
| K7             | 88.4%        | 90.4%        | 59.6%        | 97.1%        | 97.7%        | 88.4%        |              | 84.8%        | 79.0%        | 88.9%        | <b>86.0%</b> | <b>3.8%</b> |
| K8             | 84.1%        | 90.4%        | 74.2%        | 97.9%        | 94.4%        | 71.4%        | 54.2%        |              | 44.2%        | 74.3%        | <b>76.1%</b> | <b>6.0%</b> |
| K9             | 87.4%        | 92.4%        | 64.7%        | 94.9%        | 94.3%        | 69.9%        | 73.9%        | 59.4%        |              | 62.7%        | <b>77.7%</b> | <b>4.8%</b> |
| K10            | 87.6%        | 90.9%        | 56.6%        | 96.3%        | 95.6%        | 77.0%        | 68.0%        | 73.9%        | 90.2%        |              | <b>81.8%</b> | <b>4.6%</b> |
| <b>Average</b> | <b>87.0%</b> | <b>91.5%</b> | <b>67.3%</b> | <b>93.7%</b> | <b>96.0%</b> | <b>76.6%</b> | <b>69.2%</b> | <b>77.9%</b> | <b>83.9%</b> | <b>76.2%</b> |              |             |

**Table 3. Training results of the 9-fold cross validation using ResNet50**

| Testing folds | k1_val       | k2_val       | k3_val       | k4_val       | k5_val       | k6_val       | k7_val       | k8_val       | k9_val       | k10_val      | average      | std error   |
|---------------|--------------|--------------|--------------|--------------|--------------|--------------|--------------|--------------|--------------|--------------|--------------|-------------|
| K1            |              | 87.5%        | 77.9%        | 95.6%        | 95.1%        | 81.9%        | 72.4%        | 90.0%        | 98.0%        | 85.4%        | <b>87.1%</b> | <b>2.9%</b> |
| K2            | 89.8%        |              | 84.6%        | 97.7%        | 96.2%        | 75.1%        | 78.4%        | 79.4%        | 98.6%        | 82.7%        | <b>87.0%</b> | <b>3.0%</b> |
| K3            | 87.9%        | 88.4%        |              | 95.8%        | 95.9%        | 85.4%        | 73.1%        | 85.4%        | 95.4%        | 89.0%        | <b>88.5%</b> | <b>2.4%</b> |
| K4            | 86.2%        | 86.2%        | 77.7%        |              | 90.7%        | 76.3%        | 79.5%        | 90.5%        | 98.0%        | 80.2%        | <b>85.0%</b> | <b>2.4%</b> |
| K5            | 81.9%        | 86.9%        | 81.6%        | 93.2%        |              | 88.7%        | 81.8%        | 86.0%        | 95.9%        | 94.2%        | <b>87.8%</b> | <b>1.9%</b> |
| K6            | 88.5%        | 87.4%        | 83.5%        | 93.5%        | 97.9%        |              | 82.4%        | 86.3%        | 96.7%        | 79.4%        | <b>88.4%</b> | <b>2.1%</b> |
| K7            | 86.0%        | 86.1%        | 87.9%        | 97.9%        | 94.2%        | 86.2%        |              | 86.4%        | 91.9%        | 80.8%        | <b>88.6%</b> | <b>1.7%</b> |
| K8            | 89.3%        | 88.8%        | 78.8%        | 96.4%        | 94.9%        | 75.2%        | 79.9%        |              | 95.7%        | 90.4%        | <b>87.7%</b> | <b>2.6%</b> |
| K9            | 81.8%        | 87.0%        | 83.9%        | 96.5%        | 96.9%        | 75.3%        | 65.7%        | 81.8%        |              | 70.2%        | <b>82.1%</b> | <b>3.6%</b> |
| K10           | 88.5%        | 91.1%        | 81.8%        | 96.4%        | 96.5%        | 86.2%        | 65.5%        | 87.9%        | 93.3%        |              | <b>87.5%</b> | <b>3.2%</b> |
| Average       | <b>86.7%</b> | <b>87.7%</b> | <b>82.0%</b> | <b>95.9%</b> | <b>95.4%</b> | <b>81.1%</b> | <b>75.4%</b> | <b>86.0%</b> | <b>95.9%</b> | <b>83.6%</b> |              |             |

**Table 4. Training results of the 9-fold cross validation using PT ResNet50**

| Testing folds | k1_val       | k2_val       | k3_val       | k4_val       | k5_val       | k6_val       | k7_val       | k8_val       | k9_val       | k10_val      | average      | std error   |
|---------------|--------------|--------------|--------------|--------------|--------------|--------------|--------------|--------------|--------------|--------------|--------------|-------------|
| K1            |              | 89.4%        | 89.4%        | 94.5%        | 93.6%        | 78.5%        | 84.1%        | 85.2%        | 93.0%        | 94.6%        | <b>89.2%</b> | <b>2.4%</b> |
| K2            | 86.8%        |              | 84.2%        | 94.1%        | 99.7%        | 90.5%        | 91.4%        | 73.3%        | 99.1%        | 88.9%        | <b>89.8%</b> | <b>2.4%</b> |
| K3            | 85.0%        | 86.5%        |              | 92.5%        | 97.1%        | 93.1%        | 88.3%        | 81.4%        | 91.6%        | 63.7%        | <b>86.6%</b> | <b>2.4%</b> |
| K4            | 88.3%        | 90.6%        | 83.9%        |              | 95.4%        | 87.6%        | 90.5%        | 80.6%        | 96.7%        | 76.4%        | <b>87.8%</b> | <b>2.3%</b> |
| K5            | 88.1%        | 84.8%        | 81.3%        | 93.1%        |              | 89.1%        | 94.5%        | 80.6%        | 95.5%        | 82.2%        | <b>87.7%</b> | <b>2.3%</b> |
| K6            | 89.0%        | 89.6%        | 85.4%        | 96.1%        | 98.1%        |              | 86.6%        | 77.6%        | 95.8%        | 74.8%        | <b>88.1%</b> | <b>2.4%</b> |
| K7            | 85.0%        | 89.3%        | 81.2%        | 93.6%        | 96.4%        | 89.2%        |              | 83.5%        | 77.2%        | 83.8%        | <b>86.6%</b> | <b>2.8%</b> |
| K8            | 89.4%        | 80.0%        | 74.1%        | 95.1%        | 97.6%        | 89.7%        | 75.9%        |              | 97.1%        | 93.0%        | <b>88.0%</b> | <b>2.9%</b> |
| K9            | 85.1%        | 89.7%        | 73.4%        | 89.7%        | 97.8%        | 84.0%        | 92.8%        | 76.8%        |              | 76.7%        | <b>85.1%</b> | <b>3.0%</b> |
| K10           | 89.3%        | 92.1%        | 78.5%        | 96.2%        | 98.0%        | 80.9%        | 87.1%        | 78.8%        | 88.8%        |              | <b>87.7%</b> | <b>3.3%</b> |
| Average       | <b>87.3%</b> | <b>88.0%</b> | <b>81.3%</b> | <b>93.9%</b> | <b>97.1%</b> | <b>86.9%</b> | <b>87.9%</b> | <b>79.8%</b> | <b>92.8%</b> | <b>81.6%</b> |              |             |

The following tables show the confusion matrix for each of the 10 kidneys in the 10-fold cross-testing.

| Kidney 1 |         | Predicted |        |       | Total |
|----------|---------|-----------|--------|-------|-------|
|          |         | Medulla   | Cortex | Calyx |       |
| True     | Medulla | 990       | 10     | 0     | 1000  |
|          | Cortex  | 703       | 297    | 0     | 1000  |

|          |         |           |        |       |       |
|----------|---------|-----------|--------|-------|-------|
|          | Calyx   | 26        | 0      | 974   | 1000  |
| Total    |         | 1719      | 307    | 974   |       |
| Kidney 2 |         | Predicted |        |       | Total |
|          |         | Medulla   | Cortex | Calyx |       |
| True     | Medulla | 713       | 262    | 25    | 1000  |
|          | Cortex  | 2         | 990    | 8     | 1000  |
|          | Calyx   | 0         | 67     | 933   | 1000  |
| Total    |         | 715       | 1319   | 966   |       |

|          |         |           |        |       |       |
|----------|---------|-----------|--------|-------|-------|
| Kidney 3 |         | Predicted |        |       | Total |
|          |         | Medulla   | Cortex | Calyx |       |
| True     | Medulla | 750       | 250    | 0     | 1000  |
|          | Cortex  | 593       | 407    | 0     | 1000  |
|          | Calyx   | 0         | 16     | 984   | 1000  |
| Total    |         | 1343      | 673    | 984   |       |

|          |         |           |        |       |       |
|----------|---------|-----------|--------|-------|-------|
| Kidney 4 |         | Predicted |        |       | Total |
|          |         | Medulla   | Cortex | Calyx |       |
| True     | Medulla | 988       | 12     | 0     | 1000  |
|          | Cortex  | 126       | 870    | 4     | 1000  |
|          | Calyx   | 15        | 79     | 906   | 1000  |
| Total    |         | 1129      | 961    | 910   |       |

|          |         |           |        |       |       |
|----------|---------|-----------|--------|-------|-------|
| Kidney 5 |         | Predicted |        |       | Total |
|          |         | Medulla   | Cortex | Calyx |       |
| True     | Medulla | 998       | 2      | 0     | 1000  |
|          | Cortex  | 26        | 953    | 21    | 1000  |
|          | Calyx   | 0         | 155    | 845   | 1000  |
| Total    |         | 1024      | 1110   | 866   |       |

|          |         |           |        |       |       |
|----------|---------|-----------|--------|-------|-------|
| Kidney 6 |         | Predicted |        |       | Total |
|          |         | Medulla   | Cortex | Calyx |       |
| True     | Medulla | 989       | 11     | 0     | 1000  |
|          | Cortex  | 0         | 57     | 943   | 1000  |
|          | Calyx   | 0         | 16     | 984   | 1000  |
| Total    |         | 989       | 84     | 1927  |       |

|          |         |           |        |       |       |
|----------|---------|-----------|--------|-------|-------|
| Kidney 7 |         | Predicted |        |       | Total |
|          |         | Medulla   | Cortex | Calyx |       |
| True     | Medulla | 943       | 57     | 0     | 1000  |
|          | Cortex  | 3         | 848    | 149   | 1000  |

|          |         |           |        |       |       |
|----------|---------|-----------|--------|-------|-------|
|          | Calyx   | 0         | 286    | 714   | 1000  |
| Total    |         | 946       | 1191   | 863   |       |
| Kidney 8 |         | Predicted |        |       | Total |
|          |         | Medulla   | Cortex | Calyx |       |
| True     | Medulla | 707       | 144    | 149   | 1000  |
|          | Cortex  | 2         | 940    | 58    | 1000  |
|          | Calyx   | 0         | 1      | 999   | 1000  |
| Total    |         | 709       | 1085   | 1206  |       |

|          |         |           |        |       |       |
|----------|---------|-----------|--------|-------|-------|
| Kidney 9 |         | Predicted |        |       | Total |
|          |         | Medulla   | Cortex | Calyx |       |
| True     | Medulla | 1000      | 0      | 0     | 1000  |
|          | Cortex  | 7         | 993    | 0     | 1000  |
|          | Calyx   | 94        | 132    | 774   | 1000  |
| Total    |         | 1101      | 1125   | 774   |       |

|           |         |           |        |       |       |
|-----------|---------|-----------|--------|-------|-------|
| Kidney 10 |         | Predicted |        |       | Total |
|           |         | Medulla   | Cortex | Calyx |       |
| True      | Medulla | 1000      | 0      | 0     | 1000  |
|           | Cortex  | 580       | 419    | 1     | 1000  |
|           | Calyx   | 1         | 194    | 805   | 1000  |
| Total     |         | 1581      | 613    | 806   |       |

The following plots show the ROC curve of each of the 10 kidneys in the 10-fold cross-testing.

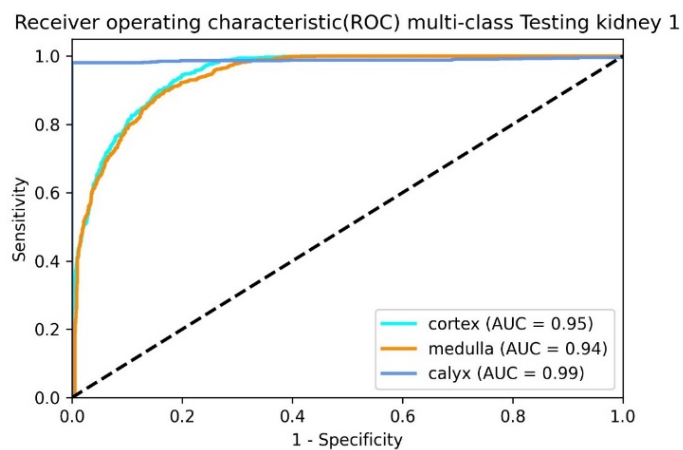

Receiver operating characteristic(ROC) multi-class Testing kidney 2

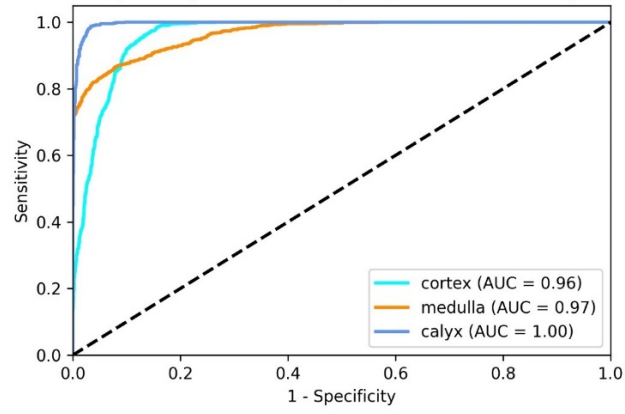

Receiver operating characteristic(ROC) multi-class Testing kidney 3

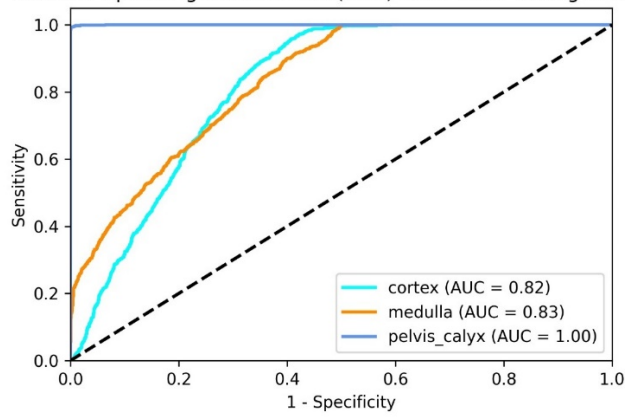

Receiver operating characteristic(ROC) multi-class Testing kidney 4

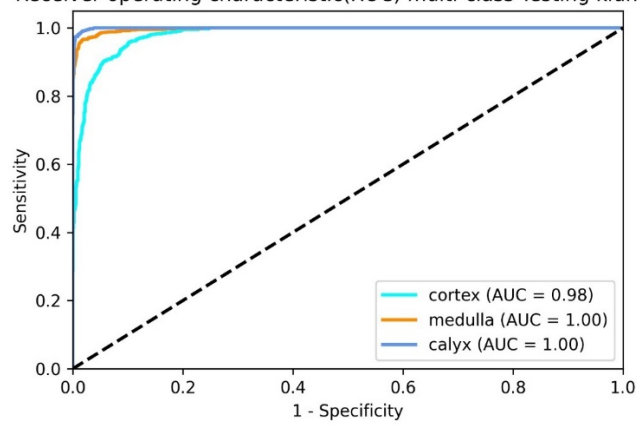

Receiver operating characteristic(ROC) multi-class Testing kidney 5

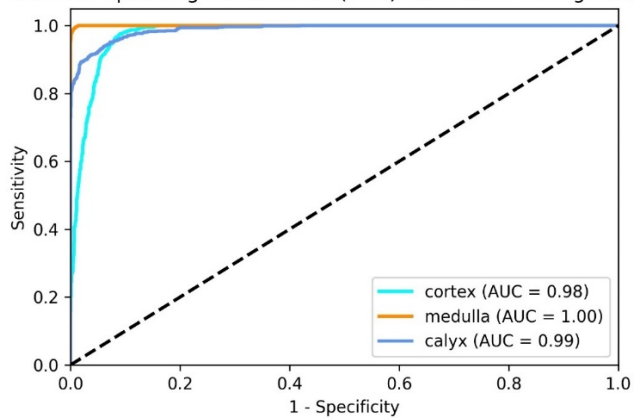

Receiver operating characteristic(ROC) multi-class Testing kidney 6

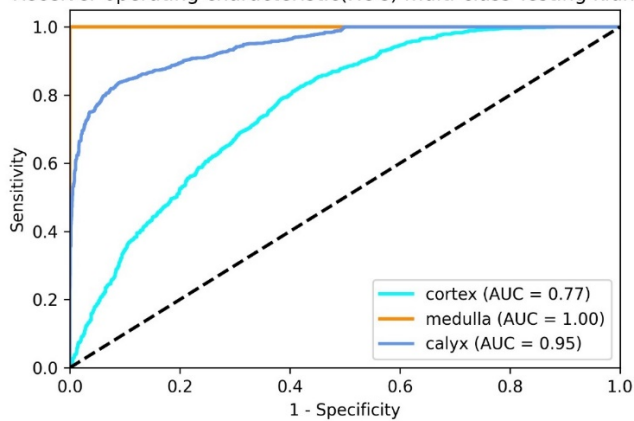

Receiver operating characteristic(ROC) multi-class Testing kidney 7

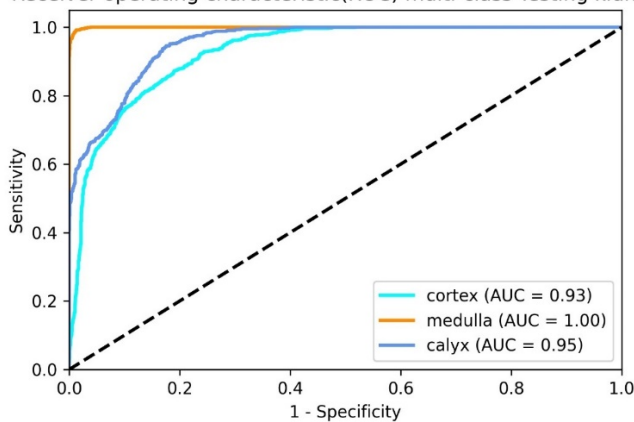



Receiver operating characteristic(ROC) multi-class Testing kidney 8

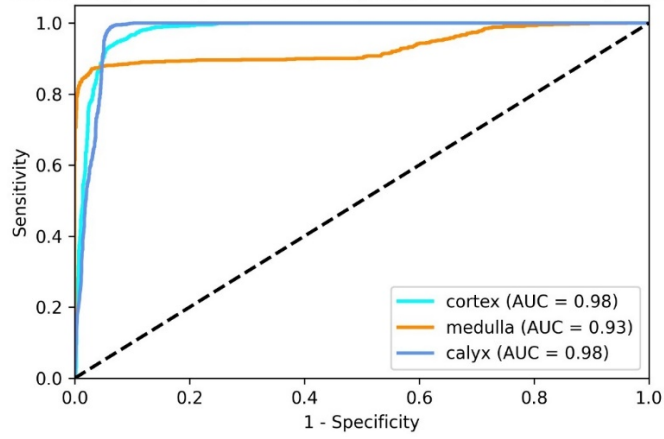

Receiver operating characteristic(ROC) multi-class Testing kidney 9

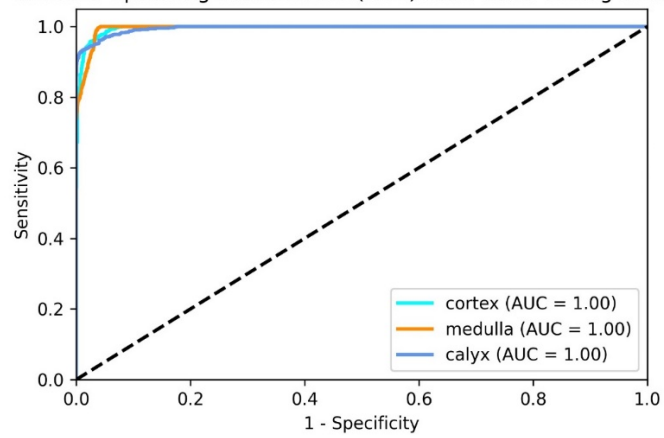

Receiver operating characteristic(ROC) multi-class Testing kidney 10

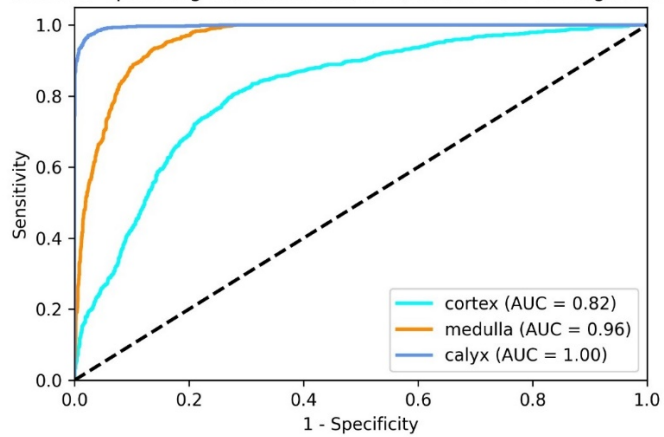

Supplement: boe-12-4-2404-s001.pdf [file boe-12-4-2404-s001.pdf]
